# Supplementary material for: Theabrownin Alleviates Colorectal Tumorigenesis in Murine AOM/DSS Model via PI3K/Akt/mTOR Pathway Suppression and Gut Microbiota Modulation
Source: MDPI journal article supplement (doi:10.3390/antiox11091716), 2022-08-30
Supplement: s1 [file s1]

# Theabrownin alleviates colorectal tumorigenesis in murine AOM/DSS model via PI3K/Akt/mTOR pathway suppression and gut microbiota modulation

Hoi Kit Matthew Leung <sup>1,†</sup>, Emily Kwun Kwan Lo <sup>1,†,\*</sup> and Hani El-Nezami <sup>1,2,\*</sup>

<sup>1</sup> School of Biological Sciences, University of Hong Kong, Pokfulam 999077, Hong Kong, China

<sup>2</sup> Institute of Public Health and Clinical Nutrition, School of Medicine, University of Eastern Finland, FI-70211 Kuopio, Finland

\* Correspondence: emilylkk@hku.hk (E.K.K.L.)

†Equally contributed to the manuscript.

## Supplementary Figures

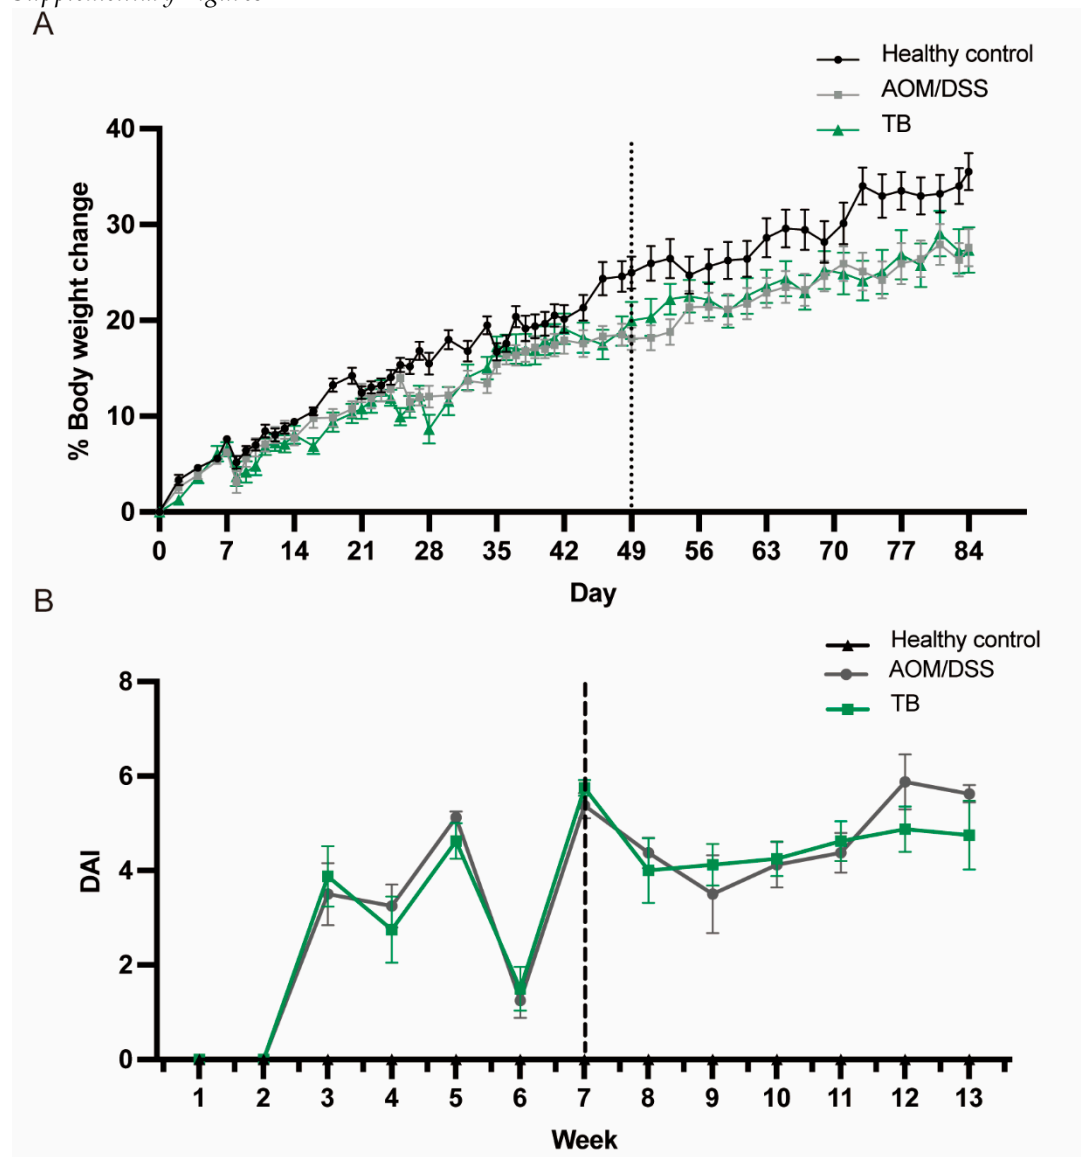

Figure S1. (A) Changes of bodyweight and (B) and Disease Activity Index (DAI)

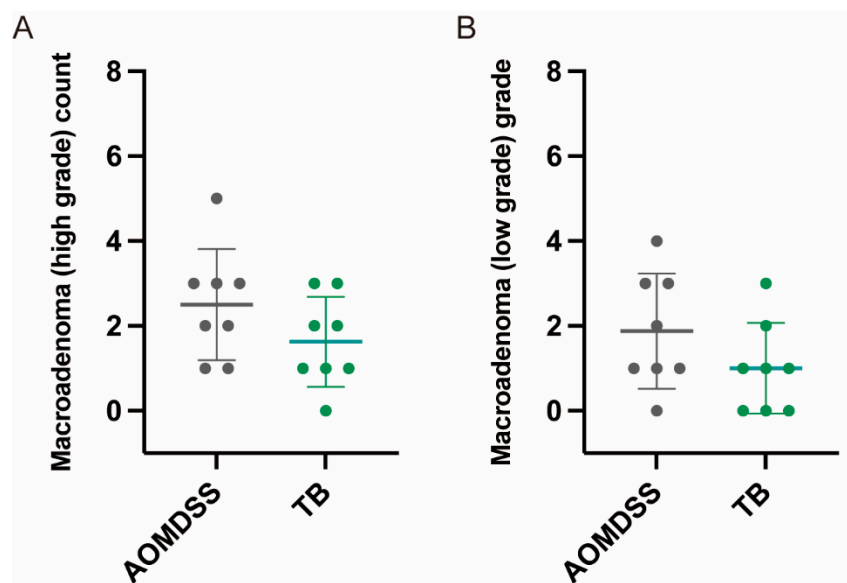

**FigureS2.** (A) Macroadenoma count (high grade). (B) Macroadenoma count (low grade).

### Supplementary Methodology

#### 1. Disease Activity Index (DAI)

The severity of the AOM/DSS induced colitis was monitored with Disease Activity Index (DAI) throughout the experimental period as previously described [1]. In brief, DAI score is a combined score consisted of the measurement of bodyweight loss, stool consistency and stool blood from 0 to 4 (Supp. Table 1). The presence of hemocult blood was determined with the aid of Hemocult SENSEA testing kit (Hemocue, USA). The scoring of each measurement is as follows:

**Supp. Table S1.** Disease Activity Index (DAI) scoring.

| Score | Weight loss | Stool consistency     | Stool blood                   |
|-------|-------------|-----------------------|-------------------------------|
| 0     | None        | Normal                | Negative hemocult             |
| 1     | 1-5%        | Soft but still formed | Negative hemocult             |
| 2     | 5-10%       | Soft                  | Positive hemocult             |
| 3     | 10-18%      | Very soft; wet        | Blood traces in stool visible |
| 4     | >18%        | Watery diarrhea       | Gross rectal bleeding         |

#### Reference:

1. Wirtz, S., et al., *Chemically induced mouse models of acute and chronic intestinal inflammation*. Nature protocols, 2017. **12**(7): p. 1295-1309.
